# Supplementary material
Source: publisher figshare collection journal article supplement (https://acs.figshare.com/ndownloader/files/4660315)
Supplement: Supplementary file 1 [file 4660315]

## Supporting Information

### Well-Ordered Mesoporous Carbon Thin Film with Perpendicular Channels: Fuel Cell Application

Meng-Liang Lin, Chun-Chieh Huang, Man-Yin Lo, and Chung-Yuan Mou \*

In supporting materials, we give more results of the characterization of the mesoporous carbon TFC.

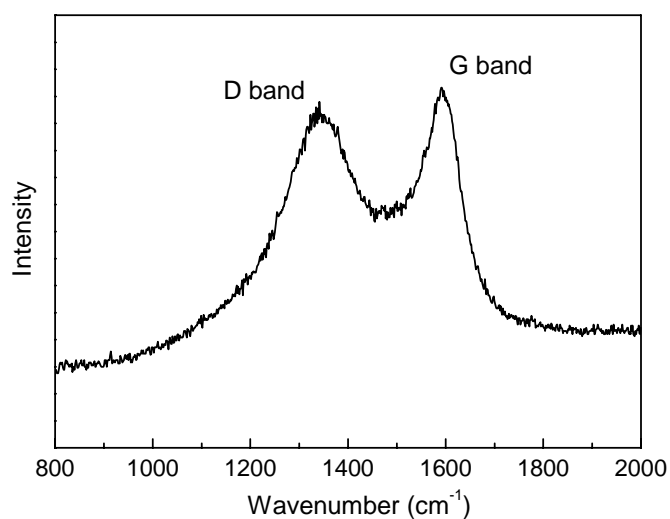

**Figure S1.** Raman spectrum of the TFC carbon.

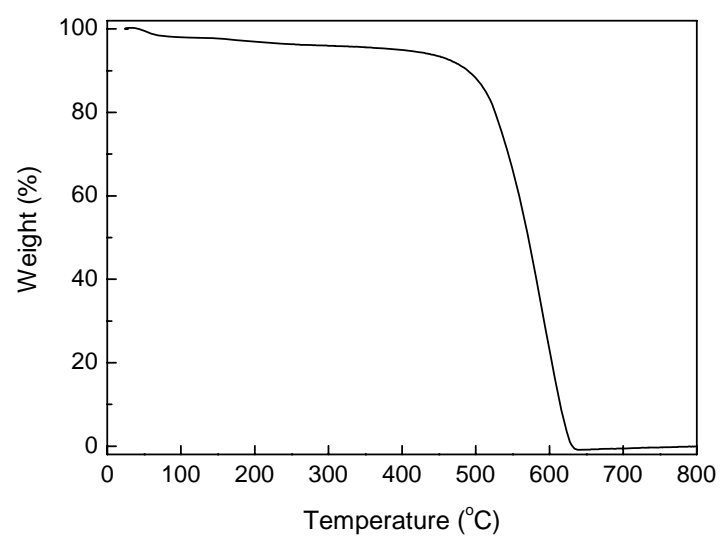

**Figure S2.** Thermal gravimetric analysis of the TFC carbon.

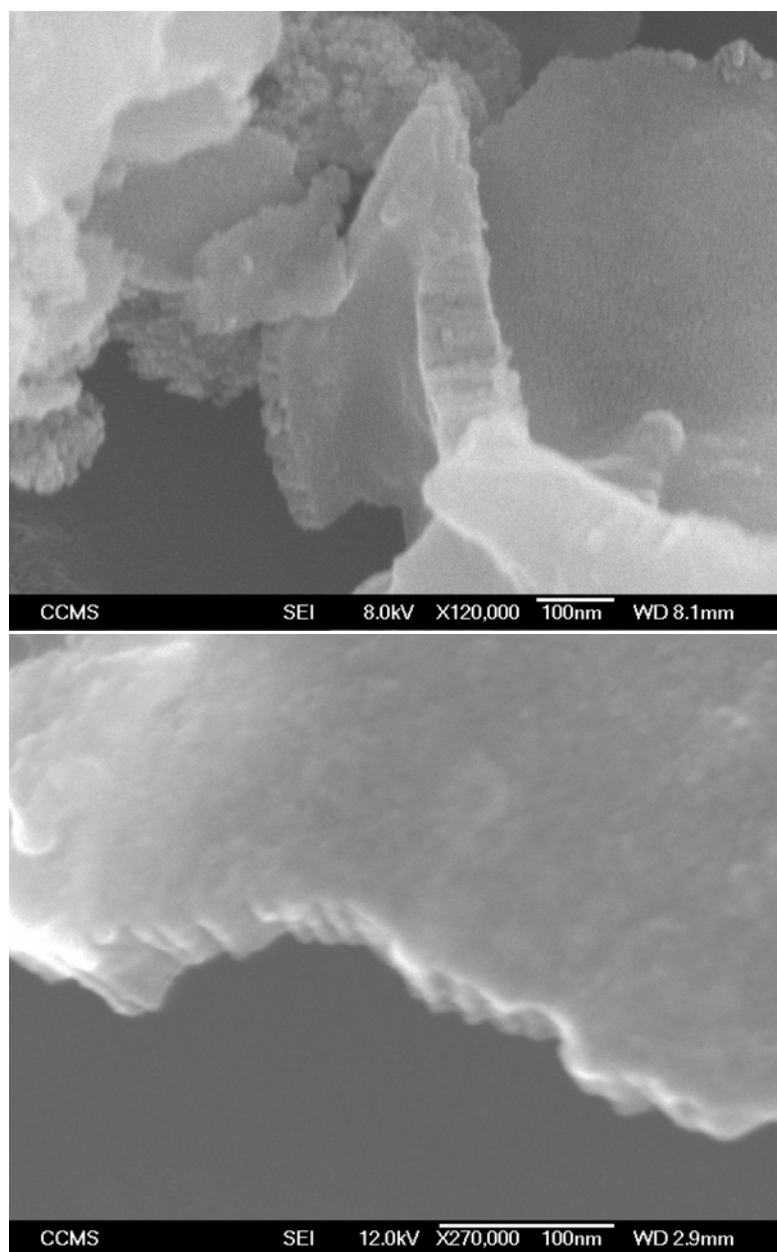

**Figure S3.** FE-SEM images of the TFC carbon.

Figure S3. shows more SEM micrographs demonstrating the thin film nature of TFC. From the texture of the edge, one can see the nanochannels are indeed perpendicular to the film.

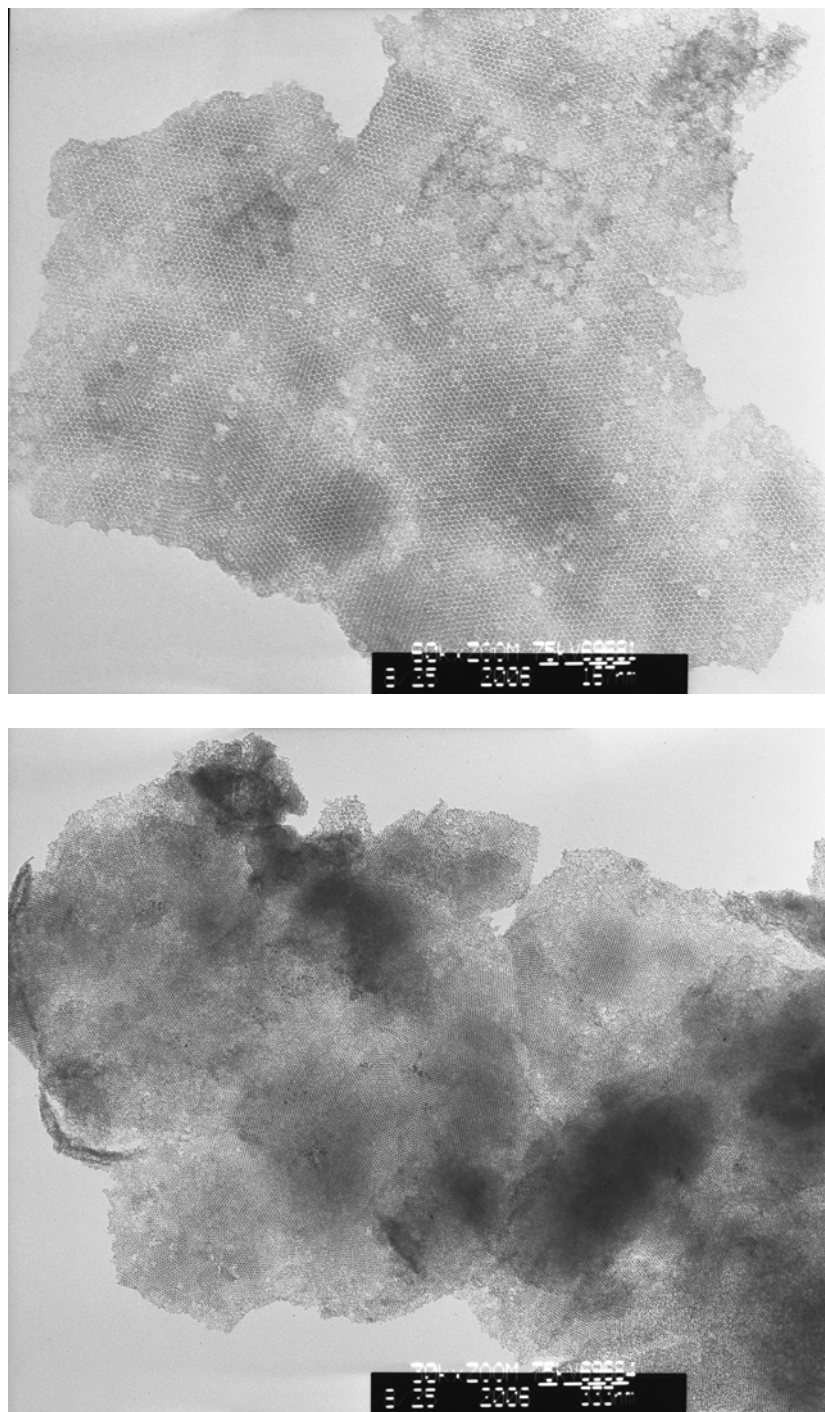

**Figure S4.** TEM images of the TFC carbon. The scale bars are 167 nm (upper) and 333 nm (lower).

Figure S4. gives TEM pictures of TFC. One can see that the pore openings are facing up. There are many defects among the nanopores.
